# Supplementary material for: The Relationship between ECOG-PS, mGPS, BMI/WL Grade and Body Composition and Physical Function in Patients with Advanced Cancer
Source: PubMed Central journal article supplement (PMC7281405; doi:10.3390/cancers12051187), 2020-05-08
Supplement: cancers-12-01187-s001.pdf [file cancers-12-01187-s001.pdf]

**Table S1.** The relationship between ECOG-PS, mGPS, BMI/WL grade and SMI, SMD and physical function in patients with advanced lung cancer (n = 177).

| <b>Table S1a</b>                               |                   |                |                     |                |
|------------------------------------------------|-------------------|----------------|---------------------|----------------|
| <b>High subcutaneous fat index n = 76</b>      | <b>Univariate</b> | <b>p-value</b> | <b>Multivariate</b> | <b>p-value</b> |
| ECOG-PS                                        | 1.13 (0.55–2.34)  | 0.743          | —                   | 0.393          |
| mGPS                                           | 0.65 (0.35–1.20)  | 0.170          | —                   | 0.331          |
| BMI/WL Grade                                   | 0.58 (0.28–1.18)  | 0.131          | —                   | 0.131          |
| <b>Table S1b</b>                               |                   |                |                     |                |
| <b>High visceral obesity n = 76</b>            | <b>Univariate</b> | <b>p-value</b> | <b>Multivariate</b> | <b>p-value</b> |
| ECOG-PS                                        | 1.33 (0.65–2.70)  | 0.437          | —                   | 0.374          |
| mGPS                                           | 1.32 (0.77–2.27)  | 0.320          | —                   | 0.107          |
| BMI/WL Grade                                   | 0.57 (0.28–1.14)  | 0.114          | —                   | 0.114          |
| <b>Table S1c</b>                               |                   |                |                     |                |
| <b>Low skeletal muscle index n = 80</b>        | <b>Univariate</b> | <b>p-value</b> | <b>Multivariate</b> | <b>p-value</b> |
| ECOG-PS                                        | 1.39 (0.74–2.60)  | 0.302          | —                   | 0.693          |
| mGPS                                           | 1.33 (0.84–2.10)  | 0.220          | —                   | 0.727          |
| BMI/WL Grade                                   | 2.39 (1.25–4.57)  | 0.009          | 2.39 (1.25–4.57)    | 0.009          |
| <b>Table S1d</b>                               |                   |                |                     |                |
| <b>Low skeletal muscle radiodensity n = 96</b> | <b>Univariate</b> | <b>p-value</b> | <b>Multivariate</b> | <b>p-value</b> |
| ECOG-PS                                        | 2.50 (1.15–5.42)  | 0.020          | —                   | 0.056          |
| mGPS                                           | 1.76 (1.09–2.86)  | 0.021          | —                   | 0.157          |
| BMI/WL Grade                                   | 2.41 (1.16–5.00)  | 0.018          | —                   | 0.051          |
| <b>Table S1e</b>                               |                   |                |                     |                |
| <b>Timed up and go test failure n = 155</b>    | <b>Univariate</b> | <b>p-value</b> | <b>Multivariate</b> | <b>p-value</b> |
| ECOG-PS                                        | 5.12 (2.60–10.06) | <0.001         | 5.12 (2.60–10.06)   | <0.001         |
| mGPS                                           | 1.09 (0.74–1.60)  | 0.663          | —                   | 0.320          |
| BMI/WL Grade                                   | 1.41 (0.85–2.35)  | 0.185          | —                   | 0.283          |
| <b>Table S1f</b>                               |                   |                |                     |                |
| <b>Hand grip strength test failure n = 22</b>  | <b>Univariate</b> | <b>p-value</b> | <b>Multivariate</b> | <b>p-value</b> |
| ECOG-PS                                        | 2.50 (0.41–15.23) | 0.320          | —                   | 0.273          |
| mGPS                                           | 1.74 (0.66–4.58)  | 0.266          | —                   | 0.266          |
| BMI/WL Grade                                   | 1.91 (0.42–8.80)  | 0.404          | —                   | 0.791          |

**Table S2.** The relationship between ECOG-PS, mGPS, BMI/WL grade and SMI, SMD and physical function in patients with advanced GI cancer (n = 180).

| <b>Table S2a</b>                               |                   |                |                     |                |
|------------------------------------------------|-------------------|----------------|---------------------|----------------|
| <b>High subcutaneous fat index n = 39</b>      | <b>Univariate</b> | <b>p-value</b> | <b>Multivariate</b> | <b>p-value</b> |
| ECOG-PS                                        | 1.42 (0.60–3.35)  | 0.429          | —                   | 0.429          |
| mGPS                                           | 1.13 (0.57–2.26)  | 0.725          | —                   | 0.894          |
| BMI/WL Grade                                   | 0.88 (0.40–1.95)  | 0.756          | —                   | 0.844          |
| <b>Table S2b</b>                               |                   |                |                     |                |
| <b>High visceral obesity n = 39</b>            | <b>Univariate</b> | <b>p-value</b> | <b>Multivariate</b> | <b>p-value</b> |
| ECOG-PS                                        | 1.13 (0.49–2.60)  | 0.770          | —                   | 0.486          |
| mGPS                                           | 0.79 (0.40–1.56)  | 0.490          | —                   | 0.580          |
| BMI/WL Grade                                   | 0.54 (0.24–1.21)  | 0.131          | —                   | 0.131          |
| <b>Table S2c</b>                               |                   |                |                     |                |
| <b>Low skeletal muscle index n = 103</b>       | <b>Univariate</b> | <b>p-value</b> | <b>Multivariate</b> | <b>p-value</b> |
| ECOG-PS                                        | 1.38 (0.78–2.45)  | 0.262          | —                   | 0.262          |
| mGPS                                           | 0.87 (0.57–1.33)  | 0.511          | —                   | 0.288          |
| BMI/WL Grade                                   | 1.29 (0.77–2.18)  | 0.332          | —                   | 0.420          |
| <b>Table S2d</b>                               |                   |                |                     |                |
| <b>Low skeletal muscle radiodensity n = 95</b> | <b>Univariate</b> | <b>p-value</b> | <b>Multivariate</b> | <b>p-value</b> |
| ECOG-PS                                        | 2.02 (1.06–3.82)  | 0.032          | 2.02 (1.06–3.82)    | 0.032          |
| mGPS                                           | 1.21 (0.78–1.86)  | 0.402          | —                   | 0.915          |
| BMI/WL Grade                                   | 1.55 (0.90–2.67)  | 0.114          | —                   | 0.249          |
| <b>Table S2e</b>                               |                   |                |                     |                |
| <b>Timed up and go test failure n = 113</b>    | <b>Univariate</b> | <b>p-value</b> | <b>Multivariate</b> | <b>p-value</b> |
| ECOG-PS                                        | 5.54 (2.59–11.87) | <0.001         | 7.02 (2.78–17.72)   | <0.001         |
| mGPS                                           | 1.99 (1.26–3.14)  | 0.003          | 1.76 (1.02–3.01)    | 0.041          |
| BMI/WL Grade                                   | 0.73 (0.44–1.21)  | 0.219          | 0.39 (0.20–0.77)    | 0.007          |
| <b>Table S2f</b>                               |                   |                |                     |                |
| <b>Hand grip strength test failure n = 67</b>  | <b>Univariate</b> | <b>p-value</b> | <b>Multivariate</b> | <b>p-value</b> |
| ECOG-PS                                        | 2.05 (0.80–5.29)  | 0.136          | —                   | 0.326          |
| mGPS                                           | 1.87 (1.08–3.23)  | 0.026          | 1.87 (1.08–3.23)    | 0.026          |
| BMI/WL Grade                                   | 0.77 (0.36–1.64)  | 0.501          | —                   | 0.327          |
